# Supplementary material for: G-Protein-Coupled Receptor 91-Dependent Signalling Does Not Influence Vascular Inflammation and Atherosclerosis in Hyperlipidaemic Mice
Source: MDPI journal article supplement (doi:10.3390/cells12212580), 2023-11-06
Supplement: s1 [file s1]

## SUPPLEMENTARY MATERIAL

**Supplementary Table S1. List of primers used in the study**

| <b>Gene target</b> | <b>Forward primer (5' to 3')</b> | <b>Reverse primer (5' to 3')</b> |
|--------------------|----------------------------------|----------------------------------|
| <i>Cd68</i>        | ATC CCC ACC TGT CTC TCT CA       | TTG CAT TTC CAC AGC AGA AG       |
| <i>Cd3e</i>        | CTG CTA CAC ACC AGC CTC AA       | GCC TTC CTA TTC TTG CTC CA       |
| <i>Chil3</i>       | CCC TGC CTG TGT ACT CAC CT       | GTC CAA ACT TCC ATC CTC CA       |
| <i>Cxcl10</i>      | AAG TGC TGC CGT CAT TTT CT       | CCT ATG GCC CTA ATT CTC AC       |
| <i>Nos2</i>        | ACT GTG TGC CTG GAG GTT CT       | TCT CTG CCT ATC CGT CTC GT       |
| <i>Fizz1</i>       | CCC TTC TCA TCT GCA TCT CC       | AGG AGG CCC ATC TGT TCA TA       |
| <i>Cd206</i>       | AGT GAT GGA ACC CCA GTG AC       | AGT GGT TGC TCA CAG GCT CT       |
| <i>Arg1</i>        | GCA GAG GTC CAG AAG AAT GG       | CTG GTT GTC AGG GGA GTG TT       |
| <i>Tnf</i>         | CAA AGG GAG AGT GGT CAG GT       | ATT GCA CCT CAG GGA AGA GT       |
| <i>Abcc6</i>       | TGC GGC CTA TCA CTT GCT C        | CCA GCA CCA TTT TGG TTT TGA A    |
| <i>G3bp</i>        | TGC TGG TTC CAG GGA CTC AA       | CCA CCG GCC TCT GTA GAA GA       |
| <i>Tbp</i>         | CAG CCT TCC ACC TTA TGC TC       | TTG CTG CTG CTG TCT TTG TT       |

**Supplementary Table S2. Filtering and parameters used for analyses of scRNAseq datasets.**

| <b>Dataset</b>                 | <b>Minimum number of genes</b> | <b>Minimum number of genes</b> | <b>Maximum percentage of mitochondrial reads</b> | <b>Principal components</b> | <b>Resolution</b> |
|--------------------------------|--------------------------------|--------------------------------|--------------------------------------------------|-----------------------------|-------------------|
| GSE131778<br>(Wirka et al.)    | 500                            | 3500                           | 7.5                                              | 10                          | 0.5               |
| GSE155512<br>(Pan et al.)      | 200                            | 4000                           | 10                                               | 10                          | 0.15              |
| GSE159677<br>(Alsaight et al.) | 300                            | 4000                           | 10                                               | 10                          | 0.5               |

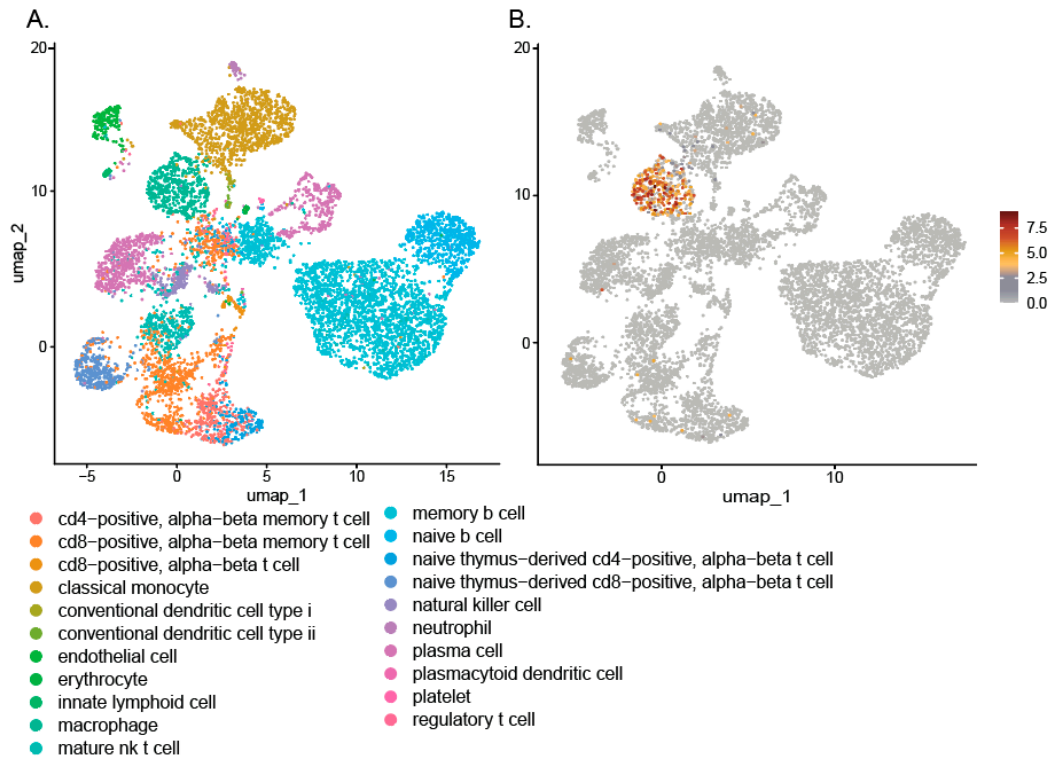

**Supplementary Figure S1. *SUCNR1*(*GPR91*) is expressed mainly in macrophages in the human spleen.** A) dimplot showing different cell types in human splenic tissue. B) Feature plot showing expression of *SUCNR1*.

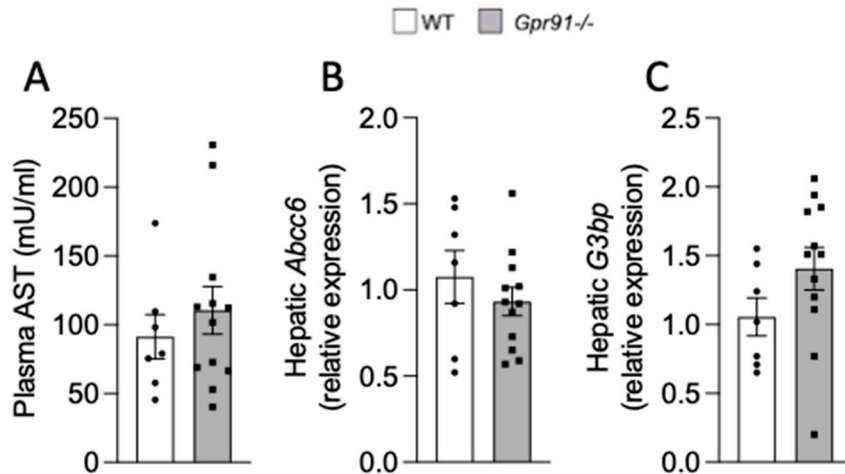

**Supplementary Figure S2. Liver toxicity status.** Mice were injected with rAAV8-D377Y-mPcsk9 and fed a WTD for 14 weeks. A) AST levels in plasma. B) Relative mRNA expression of associated makers of liver damage *Abcc6* and *G3bp* in the liver from WT and *Gpr91*<sup>-/-</sup> mice (n = 7-12). Results are shown as mean  $\pm$  SEM; graphs show pooled data from two independent experiments. Mann-Whitney U-test shows no differences between groups.
